# Supplementary material for: Assessing Heat Tolerance in Creeping Bentgrass Lines Based on Physiological Responses
Source: MDPI journal article supplement (doi:10.3390/plants12010041), 2022-12-22
Supplement: s1 [file s1]

**Table S1.** Change in visual turf quality rating for creeping bentgrass lines over time under control (20/15°C day/night) and heat stress (38/33°C day/night) conditions

| Lines        | Control |     |     |     |     |     | Heat |     |       |        |         |        |
|--------------|---------|-----|-----|-----|-----|-----|------|-----|-------|--------|---------|--------|
|              | 0       | 7   | 14  | 21  | 28  | 35  | 0    | 7   | 14    | 21     | 28      | 35     |
| Crenshaw     | 9.0     | 8.6 | 8.7 | 8.6 | 8.8 | 8.6 | 9.0  | 8.1 | 5.9 b | 4.7 c  | 3.3 d   | 1.9 c  |
| Pure Eclipse | 9.0     | 9.0 | 9.0 | 9.0 | 9.0 | 9.0 | 9.0  | 8.1 | 7.6 a | 6.7 ab | 4.8 bc  | 2.9 bc |
| Penn A4      | 9.0     | 9.0 | 8.9 | 8.8 | 8.8 | 8.9 | 9.0  | 8.2 | 7.3 a | 6.9 a  | 5.8 ab  | 4.6 a  |
| AU Victory   | 9.0     | 9.0 | 9.0 | 9.0 | 8.9 | 8.9 | 9.0  | 8.3 | 7.7 a | 7.2 a  | 6.4 a   | 4.8 a  |
| Penncross    | 8.9     | 8.7 | 8.8 | 8.7 | 8.8 | 8.8 | 8.9  | 8.1 | 7.4 a | 6.4 ab | 5.4 abc | 4.6 a  |
| GCB2020-1    | 9.0     | 9.0 | 9.0 | 8.9 | 8.9 | 8.9 | 8.9  | 8.1 | 7.6 a | 6.8 ab | 5.6 ab  | 4.3 ab |
| BTC011       | 8.9     | 9.0 | 9.0 | 8.9 | 8.9 | 8.8 | 9.0  | 8.1 | 7.4 a | 6.9 a  | 6.3 a   | 5.1 a  |
| BTC032       | 9.0     | 9.0 | 9.0 | 8.9 | 8.8 | 8.7 | 9.0  | 8.0 | 7.1 a | 6.8 ab | 6.4 a   | 5.6 a  |
| S11 675-02   | 9.0     | 9.0 | 9.0 | 8.7 | 8.6 | 8.7 | 9.0  | 8.0 | 7.4 a | 6.0 b  | 4.3 cd  | 3.0 bc |
| S11 729-10   | 9.0     | 9.0 | 9.0 | 9.0 | 9.0 | 8.9 | 9.0  | 8.1 | 7.6 a | 6.9 a  | 6.1 a   | 5.8 a  |
| LSD          | ns      | ns  | ns  | ns  | ns  | ns  | ns   | ns  | 0.59  | 0.91   | 1.2     | 1.5    |

Note: values followed by a common lowercase letter within each column indicate no significant difference among various lines at  $p = 0.05$ ; ns, not significant

**Table S2.** Change in green cover (%) for creeping bentgrass lines over time under control (20/15°C day/night) and heat stress (38/33°C day/night) conditions

| Lines        | Control |             |      |      |            |      | Heat       |      |        |         |          |         |
|--------------|---------|-------------|------|------|------------|------|------------|------|--------|---------|----------|---------|
|              | 0       | 7           | 14   | 21   | 28         | 35   | 0          | 7    | 14     | 21      | 28       | 35      |
| Crenshaw     | 98.0    | 96.3<br>bc  | 96.0 | 95.0 | 95.0<br>c  | 95.5 | 96.7<br>b  | 93.4 | 57.6 b | 42.8 c  | 24.9 d   | 3.8 d   |
| Pure Eclipse | 98.1    | 95.4<br>c   | 96.1 | 96.5 | 97.3<br>ab | 97.9 | 98.4<br>a  | 95.9 | 89.1 a | 76.1 ab | 39.3 bcd | 9.6 cd  |
| Penn A4      | 98.3    | 98.0<br>ab  | 96.6 | 96.1 | 96.4<br>bc | 97.4 | 97.5<br>ab | 95.7 | 87.0 a | 79.3 ab | 57.4 abc | 32.4 bc |
| AU Victory   | 98.9    | 98.2<br>a   | 96.9 | 96.1 | 96.5<br>bc | 96.9 | 98.1<br>a  | 96.2 | 89.3 a | 83.2 a  | 65.8 a   | 48.5 ab |
| Penncross    | 97.9    | 96.8<br>abc | 96.8 | 95.9 | 96.7<br>b  | 96.7 | 96.7<br>b  | 95.9 | 87.9 a | 77.9 ab | 61.1 ab  | 47.2 ab |
| GCB2020-1    | 98.6    | 97.9<br>ab  | 96.5 | 96.6 | 96.9<br>ab | 97.0 | 97.8<br>a  | 96.5 | 91.1 a | 85.5 a  | 59.2 ab  | 32.6 bc |
| BTC011       | 96.7    | 97.9<br>ab  | 97.2 | 96.6 | 96.2<br>bc | 96.1 | 97.8<br>a  | 95.7 | 86.5 a | 84.5 a  | 73.9 a   | 53.7 ab |
| BTC032       | 98.1    | 98.5<br>a   | 97.8 | 96.6 | 96.6<br>bc | 96.3 | 97.7<br>ab | 95.1 | 89.8 a | 81.9 a  | 72.6 a   | 67.6 a  |
| S11 675-02   | 97.1    | 98.1<br>a   | 96.8 | 95.9 | 95.9<br>bc | 96.5 | 97.5<br>ab | 94.8 | 82.2 a | 64.0 b  | 35.2 cd  | 12.4 cd |
| S11 729-10   | 98.3    | 98.4<br>a   | 97.2 | 97.6 | 98.4<br>a  | 97.4 | 98.4<br>a  | 96.5 | 90.9 a | 81.2 a  | 63.3 a   | 58.0 ab |
| LSD          | ns      | 1.7         | ns   | ns   | 1.7        | ns   | 1.0        | ns   | 10.8   | 17.1    | 23.2     | 27.7    |

Note: values followed by a common lowercase letter within each column indicate no significant difference among various lines at  $p = 0.05$ ; ns, not significant

**Table S3.** Change in total chlorophyll content (mg per g DW) for creeping bentgrass lines over time under control (20/15°C day/night) and heat stress (38/33°C day/night) conditions

| Lines        | Control     |             |      |              |      |      | Heat |             |             |            |             |         |
|--------------|-------------|-------------|------|--------------|------|------|------|-------------|-------------|------------|-------------|---------|
|              | 0           | 7           | 14   | 21           | 28   | 35   | 0    | 7           | 14          | 21         | 28          | 35      |
| Crenshaw     | 19.6<br>abc | 20.0<br>ab  | 17.2 | 17.7<br>bcd  | 16.2 | 16.7 | 17.0 | 18.8<br>ab  | 7.5<br>d    | 6.1 c      | 4.7 d       | 3.4 f   |
| Pure Eclipse | 19.7<br>abc | 20.4<br>a   | 18.2 | 20.2 a       | 17.7 | 17.7 | 18.9 | 17.8<br>bcd | 13.7<br>a   | 11.5 a     | 6.2 bcd     | 4.5 ef  |
| Penn A4      | 20.4 a      | 20.3<br>a   | 18.1 | 17.9<br>bcd  | 16.2 | 16.6 | 17.5 | 18.3<br>abc | 13.1<br>ab  | 12.3 a     | 7.7<br>abcd | 6.0 cd  |
| AU Victory   | 19.4<br>abc | 19.2<br>abc | 17.3 | 18.8<br>abc  | 15.2 | 15.5 | 17.2 | 17.3<br>cd  | 12.9<br>abc | 10.4<br>ab | 7.6<br>abcd | 6.9 abc |
| Penncross    | 18.1<br>bcd | 18.8<br>bc  | 16.1 | 16.8 d       | 15.6 | 16.5 | 17.5 | 19.5<br>a   | 13.2<br>ab  | 10.5<br>ab | 7.5<br>abcd | 7.9 ab  |
| GCB2020-1    | 19.2<br>abc | 19.7<br>abc | 18.2 | 19.4<br>ab   | 14.1 | 16.4 | 18.3 | 16.5<br>d   | 12.2<br>abc | 11.1 a     | 8.6 ab      | 5.0 de  |
| BTC011       | 17.9<br>cd  | 18.9<br>bc  | 17.7 | 18.5<br>abcd | 16.4 | 16.6 | 16.3 | 16.5<br>d   | 12.3<br>abc | 11.7 a     | 8.2 abc     | 6.6 bc  |
| BTC032       | 19.9<br>ab  | 19.0<br>bc  | 17.7 | 17.3<br>cd   | 15.5 | 17.0 | 16.4 | 17.5<br>bcd | 11.0<br>bc  | 11.0 a     | 7.8 abc     | 6.7 bc  |
| S11 675-02   | 19.8<br>ab  | 20.3<br>a   | 18.2 | 18.0<br>bcd  | 16.8 | 17.5 | 18.7 | 16.4<br>d   | 10.3<br>c   | 8.4 bc     | 5.2 cd      | 4.0 ef  |
| S11 729-10   | 17.1<br>d   | 18.5<br>c   | 17.5 | 17.5<br>bcd  | 16.6 | 16.4 | 17.8 | 16.8<br>d   | 12.9<br>abc | 12.3 a     | 9.7 a       | 8.2 a   |
| LSD          | 1.9         | 1.3         | ns   | 2.0          | ns   | ns   | ns   | 1.4         | 2.7         | 2.6        | ns          | 1.4     |

Note: values followed by a common lowercase letter within each column indicate no significant difference among various lines at  $p = 0.05$ ; ns, not significant

**Table S4.** Change in TRo/ABS for creeping bentgrass lines over time under control (20/15°C day/night) and heat stress (38/33°C day/night) conditions

| Lines        | Control |              |      |      |      |      | Heat |      |           |             |              |          |
|--------------|---------|--------------|------|------|------|------|------|------|-----------|-------------|--------------|----------|
|              | 0       | 7            | 14   | 21   | 28   | 35   | 0    | 7    | 14        | 21          | 28           | 35       |
| Crenshaw     | 0.82    | 0.818<br>ab  | 0.82 | 0.81 | 0.81 | 0.81 | 0.81 | 0.78 | 0.68<br>b | 0.658<br>b  | 0.588 c      | 0.41 d   |
| Pure Eclipse | 0.82    | 0.815<br>abc | 0.81 | 0.81 | 0.81 | 0.81 | 0.82 | 0.77 | 0.75<br>a | 0.718<br>a  | 0.633<br>abc | 0.52 cd  |
| Penn A4      | 0.81    | 0.823 a      | 0.81 | 0.81 | 0.81 | 0.81 | 0.82 | 0.78 | 0.75<br>a | 0.730<br>a  | 0.680<br>ab  | 0.57 abc |
| AU Victory   | 0.82    | 0.813<br>abc | 0.82 | 0.81 | 0.81 | 0.81 | 0.82 | 0.79 | 0.75<br>a | 0.743<br>a  | 0.700 a      | 0.68 a   |
| Penncross    | 0.82    | 0.82 ab      | 0.82 | 0.81 | 0.81 | 0.80 | 0.82 | 0.78 | 0.74<br>a | 0.713<br>a  | 0.610 bc     | 0.62 abc |
| GCB2020-1    | 0.83    | 0.82 ab      | 0.82 | 0.81 | 0.80 | 0.81 | 0.82 | 0.77 | 0.74<br>a | 0.733<br>a  | 0.675<br>ab  | 0.56 bc  |
| BTC011       | 0.81    | 0.805 c      | 0.82 | 0.81 | 0.80 | 0.81 | 0.81 | 0.76 | 0.74<br>a | 0.710<br>a  | 0.685<br>ab  | 0.64 ab  |
| BTC032       | 0.81    | 0.805 c      | 0.81 | 0.80 | 0.80 | 0.81 | 0.82 | 0.76 | 0.75<br>a | 0.735<br>a  | 0.713 a      | 0.65 ab  |
| S11 675-02   | 0.81    | 0.810<br>bc  | 0.81 | 0.81 | 0.81 | 0.81 | 0.82 | 0.75 | 0.73<br>a | 0.700<br>ab | 0.593 c      | 0.55 bc  |
| S11 729-10   | 0.82    | 0.810<br>bc  | 0.82 | 0.80 | 0.81 | 0.81 | 0.81 | 0.75 | 0.74<br>a | 0.703<br>a  | 0.690<br>ab  | 0.68 a   |
| LSD          | ns      | 0.011        | ns   | ns   | ns   | ns   | ns   | ns   | 0.02<br>7 | 0.044       | 0.082        | 0.11     |

Note: values followed by a common lowercase letter within each column indicate no significant difference among various lines at  $p = 0.05$ ; ns, not significant

**Table S5.** Change in ETo/ABS for creeping bentgrass lines over time under control (20/15°C day/night) and heat stress (38/33°C day/night) conditions

| Lines      | Control      |              |               |             |               |              | Heat         |              |              |               |              |              |
|------------|--------------|--------------|---------------|-------------|---------------|--------------|--------------|--------------|--------------|---------------|--------------|--------------|
|            | 0            | 7            | 14            | 21          | 28            | 35           | 0            | 7            | 14           | 21            | 28           | 35           |
| Crenshaw   | 0.535<br>ab  | 0.538<br>abc | 0.568<br>a    | 0.530<br>ab | 0.535<br>a    | 0.530<br>ab  | 0.540<br>abc | 0.488<br>abc | 0.430<br>d   | 0.393<br>e    | 0.340<br>cd  | 0.225<br>d   |
| Pure       | 0.538<br>ab  | 0.543<br>abc | 0.553<br>abcd | 0.538<br>a  | 0.532<br>ab   | 0.523<br>abc | 0.555<br>a   | 0.500<br>abc | 0.490<br>ab  | 0.468<br>abc  | 0.385<br>abc | 0.283<br>cd  |
| Eclipse    | 0.540<br>ab  | 0.560<br>a   | 0.560<br>abc  | 0.520<br>ab | 0.530<br>abc  | 0.533<br>a   | 0.548<br>ab  | 0.508<br>ab  | 0.503<br>ab  | 0.473<br>ab   | 0.423<br>ab  | 0.323<br>bc  |
| Penn A4    | 0.540<br>ab  | 0.545<br>a   | 0.565<br>abc  | 0.523<br>ab | 0.515<br>bcd  | 0.523<br>abc | 0.555<br>a   | 0.513<br>a   | 0.503<br>ab  | 0.493<br>a    | 0.428<br>a   | 0.420<br>a   |
| AU Victory | 0.525<br>bc  | 0.530<br>bc  | 0.553<br>abcd | 0.520<br>ab | 0.513<br>cd   | 0.513<br>c   | 0.545<br>ab  | 0.503<br>ab  | 0.480<br>abc | 0.445<br>bcd  | 0.368<br>bcd | 0.335<br>abc |
| Penncross  | 0.548 a      | 0.548<br>ab  | 0.560<br>abc  | 0.525<br>ab | 0.510<br>d    | 0.530<br>ab  | 0.553<br>a   | 0.508<br>ab  | 0.485<br>abc | 0.480<br>ab   | 0.413<br>ab  | 0.343<br>abc |
| GCB2020-1  | 0.510 c      | 0.538<br>abc | 0.558<br>abc  | 0.523<br>ab | 0.520<br>abcd | 0.528<br>ab  | 0.530<br>bc  | 0.505<br>ab  | 0.505<br>a   | 0.463<br>abcd | 0.423<br>ab  | 0.363<br>abc |
| BTC011     | 0.528<br>abc | 0.520<br>c   | 0.550<br>bcd  | 0.515<br>b  | 0.508<br>d    | 0.518<br>bc  | 0.525<br>c   | 0.510<br>a   | 0.505<br>a   | 0.473<br>ab   | 0.440<br>a   | 0.393<br>ab  |
| BTC032     | 0.530<br>abc | 0.533<br>bc  | 0.548<br>cd   | 0.523<br>ab | 0.518<br>abcd | 0.528<br>ab  | 0.533<br>bc  | 0.483<br>bc  | 0.458<br>cd  | 0.433<br>cd   | 0.320<br>d   | 0.288<br>cd  |
| S11 675-02 | 0.520<br>bc  | 0.528<br>bc  | 0.540<br>d    | 0.510<br>b  | 0.505<br>d    | 0.510<br>c   | 0.523<br>c   | 0.475<br>c   | 0.473<br>bc  | 0.430<br>d    | 0.425<br>ab  | 0.393<br>ab  |
| S11 729-10 | 0.022        | 0.023        | 0.017         | 0.021       | 0.018         | 0.015        | 0.020        | 0.027        | 0.032        | 0.036         | 0.059        | 0.088        |
| LSD        |              |              |               |             |               |              |              |              |              |               |              |              |

Note: values followed by a common lowercase letter within each column indicate no significant difference among various lines at  $p = 0.05$ ; ns, not significant

**Table S6.** Change in DIo/ABS for creeping bentgrass lines over time under control (20/15°C day/night) and heat stress (38/33°C day/night) conditions

| Lines      | Control |               |      |      |      |      | Heat |      |        |             |              |               |
|------------|---------|---------------|------|------|------|------|------|------|--------|-------------|--------------|---------------|
|            | 0       | 7             | 14   | 21   | 28   | 35   | 0    | 7    | 14     | 21          | 28           | 35            |
| Crenshaw   | 0.18    | 0.186<br>bcd  | 0.18 | 0.19 | 0.20 | 0.19 | 0.19 | 0.23 | 0.32 a | 0.343<br>a  | 0.414<br>a   | 0.595<br>a    |
| Pure       | 0.19    | 0.191<br>bcd  | 0.19 | 0.19 | 0.20 | 0.19 | 0.19 | 0.23 | 0.26 b | 0.285<br>bc | 0.369<br>abc | 0.484<br>ab   |
| Eclipse    | 0.19    | 0.183<br>d    | 0.19 | 0.20 | 0.20 | 0.19 | 0.19 | 0.23 | 0.25 b | 0.271<br>bc | 0.322<br>bc  | 0.434<br>bcd  |
| Penn A4    | 0.19    | 0.192<br>bcd  | 0.19 | 0.19 | 0.19 | 0.20 | 0.18 | 0.21 | 0.25 b | 0.260<br>c  | 0.300<br>c   | 0.322<br>e    |
| AU Victory | 0.19    | 0.187<br>bcd  | 0.19 | 0.19 | 0.19 | 0.20 | 0.19 | 0.22 | 0.26 b | 0.291<br>bc | 0.390<br>ab  | 0.388<br>bcde |
| Penncross  | 0.18    | 0.185<br>cd   | 0.19 | 0.20 | 0.20 | 0.19 | 0.18 | 0.23 | 0.27 b | 0.270<br>bc | 0.325<br>bc  | 0.438<br>bcd  |
| GCB2020-1  | 0.20    | 0.202<br>abc  | 0.19 | 0.20 | 0.20 | 0.19 | 0.19 | 0.24 | 0.26 b | 0.291<br>bc | 0.318<br>bc  | 0.369<br>cde  |
| BTC011     | 0.20    | 0.210<br>a    | 0.19 | 0.20 | 0.20 | 0.19 | 0.19 | 0.23 | 0.26 b | 0.267<br>bc | 0.291<br>c   | 0.347<br>cde  |
| BTC032     | 0.19    | 0.204<br>ab   | 0.19 | 0.20 | 0.20 | 0.19 | 0.19 | 0.25 | 0.27 b | 0.304<br>ab | 0.410<br>a   | 0.452<br>bc   |
| S11 675-02 | 0.19    | 0.195<br>abcd | 0.19 | 0.20 | 0.20 | 0.19 | 0.19 | 0.25 | 0.27 b | 0.298<br>bc | 0.312<br>bc  | 0.326<br>de   |
| S11 729-10 | ns      | 0.018         | ns   | ns   | ns   | ns   | ns   | ns   | 0.026  | 0.044       | 0.082        | 0.11          |
| LSD        |         |               |      |      |      |      |      |      |        |             |              |               |

Note: values followed by a common lowercase letter within each column indicate no significant difference among various lines at  $p = 0.05$ ; ns, not significant

**Table S7.** Change in ABS/CSm for creeping bentgrass lines over time under control (20/15°C day/night) and heat stress (38/33°C day/night) conditions

| Lines      | Control       |            |               |                |               |               | Heat          |            |                |               |                |               |
|------------|---------------|------------|---------------|----------------|---------------|---------------|---------------|------------|----------------|---------------|----------------|---------------|
|            | 0             | 7          | 14            | 21             | 28            | 35            | 0             | 7          | 14             | 21            | 28             | 35            |
| Crenshaw   | 2205.<br>4 ab | 2440.<br>4 | 2650.<br>8 ab | 2437.8<br>abcd | 2088.9<br>bc  | 1944.<br>0 ab | 2191.<br>4 a  | 1921.<br>9 | 1733.<br>2 c   | 1419.<br>1 b  | 1100.<br>3 c   | 595.5<br>c    |
| Pure       | 2095.         | 2359.      | 2639.         | 2527.2         | 2244.3        | 1951.         | 2093.         | 1827.      | 2053.          | 1812.         | 1231.          | 670.0         |
| Eclipse    | 5 ab          | 0          | 8 ab          | ab             | ab            | 2 ab          | 7 ab          | 3          | 5 abc          | 2 a           | 5 bc           | c             |
| Penn A4    | 2136.<br>5 ab | 2360.<br>1 | 2632.<br>9 ab | 2393.8<br>bcde | 2068.6<br>c   | 1961.<br>1 ab | 1906.<br>2 b  | 1892.<br>8 | 2041.<br>7 abc | 1998.<br>3 a  | 1603.<br>2 ab  | 1059.<br>1 ab |
| AU         | 2224.         | 2313.      | 2804.         | 2591.8         | 2173.5        | 1864.         | 2182.         | 2081.      | 2260.          | 2080.         | 1701.          | 1145.         |
| Victory    | 7 ab          | 5          | 6 a           | a              | abc           | 6 bc          | 3 a           | 3          | 7 a            | 8 a           | 0 a            | 3 ab          |
| Penncross  | 2200.<br>4 ab | 2312.<br>5 | 2672.<br>2 ab | 2351.8<br>cde  | 2132.5<br>bc  | 1861.<br>6 bc | 2150.<br>5 a  | 1954.<br>3 | 2157.<br>6 ab  | 2099.<br>3 a  | 1346.<br>6 abc | 1356.<br>2 a  |
| GCB2020-1  | 1973.<br>6 b  | 2286.<br>3 | 2682.<br>2 ab | 2278.2<br>de   | 2042.7<br>c   | 1931.<br>5 ab | 1885.<br>8 b  | 1794.<br>9 | 1845.<br>8 bc  | 1889.<br>4 a  | 1436.<br>4 abc | 911.0<br>bc   |
| BTC011     | 2072.<br>9 ab | 2234.<br>5 | 2508.<br>6 b  | 2424.5<br>bcd  | 2154.6<br>bc  | 1733.<br>5 c  | 2075.<br>7 ab | 1816.<br>8 | 2096.<br>4 ab  | 2007.<br>6 a  | 1696.<br>2 a   | 1224.<br>7 ab |
| BTC032     | 2102.<br>6    | 2254.<br>0 | 2637.<br>6 ab | 2258.0<br>e    | 2071.3<br>bc  | 1819.<br>5 bc | 2021.<br>2 ab | 1822.<br>6 | 1922.<br>8 bc  | 2057.<br>7 a  | 1658.<br>9 a   | 1310.<br>3 a  |
| S11 675-02 | 2222.<br>8 ab | 2286.<br>7 | 2680.<br>8 ab | 2403.5<br>bcde | 2174.5<br>abc | 2035.<br>3 a  | 2210.<br>2 a  | 1933.<br>3 | 1871.<br>4 bc  | 1766.<br>6 ab | 1075.<br>8 c   | 838.7<br>bc   |
| S11 729-10 | 2251.<br>5 a  | 2355.<br>6 | 2698.<br>1 ab | 2484.1<br>abc  | 2331.0<br>a   | 1919.<br>4 ab | 2157.<br>7 a  | 1966.<br>0 | 2070.<br>0 ab  | 2005.<br>8 a  | 1455.<br>6 abc | 1382.<br>0 a  |
| LSD        | 271.1         | ns         | 236.6         | 162.1          | 174.7         | 143.1         | 238.7         | ns         | 335.4          | 352.4         | 398.6          | 388.7         |

Note: values followed by a common lowercase letter within each column indicate no significant difference among various lines at  $p = 0.05$ ; ns, not significant

**Table S8.** Change in TRo/CSm for creeping bentgrass lines over time under control (20/15°C day/night) and heat stress (38/33°C day/night) conditions

| Lines      | Control    |            |            |                |        |               | Heat       |            |                |               |               |              |
|------------|------------|------------|------------|----------------|--------|---------------|------------|------------|----------------|---------------|---------------|--------------|
|            | 0          | 7          | 14         | 21             | 28     | 35            | 0          | 7          | 14             | 21            | 28            | 35           |
| Crenshaw   | 1797.<br>9 | 1984.<br>5 | 2167.<br>6 | 1967.1<br>abcd | 1684.2 | 1570.<br>6 ab | 1779.<br>3 | 1487.<br>6 | 1191.<br>4 c   | 976.0<br>c    | 672.1<br>cd   | 280.6<br>f   |
| Pure       | 1706.      | 1909.      | 2128.      | 2049.2         | 1808.9 | 1579.         | 1701.      | 1410.      | 1532.          | 1305.         | 815.4         | 386.2        |
| Eclipse    | 7          | 7          | 9          | ab             |        | 7 ab          | 7          | 0          | 1 ab           | 8 ab          | bcd           | ef           |
| Penn A4    | 1736.<br>8 | 1926.<br>8 | 2134.<br>5 | 1923.7<br>bcde | 1663.5 | 1580.<br>1 ab | 1545.<br>0 | 1473.<br>4 | 1525.<br>7 ab  | 1461.<br>4 ab | 1103.<br>5 ab | 679.2<br>bcd |
| AU         | 1807.      | 1870.      | 2279.      | 2100.0         | 1750.0 | 1496.         | 1781.      | 1646.      | 1700.          | 1550.         | 1203.         | 949.2        |
| Victory    | 1          | 6          | 1          | a              |        | 8 bc          | 7          | 4          | 0 a            | 9 a           | 1 a           | a            |
| Penncross  | 1788.<br>9 | 1879.<br>7 | 2168.<br>0 | 1901.4<br>cde  | 1721.6 | 1488.<br>8 bc | 1734.<br>6 | 1520.<br>0 | 1596.<br>4 ab  | 1505.<br>4 ab | 870.7<br>abcd | 869.0<br>ab  |
| GCB2020-1  | 1611.<br>7 | 1866.<br>5 | 2178.<br>1 | 1840.2<br>de   | 1641.0 | 1563.<br>6 ab | 1541.<br>2 | 1392.<br>0 | 1367.<br>2 bc  | 1396.<br>1 ab | 999.4<br>abc  | 585.0<br>cde |
| BTC011     | 1663.<br>9 | 1785.<br>0 | 2035.<br>4 | 1946.0<br>bcd  | 1722.0 | 1406.<br>5 c  | 1676.<br>5 | 1386.<br>7 | 1545.<br>5 ab  | 1440.<br>1 ab | 1167.<br>1 a  | 835.6<br>abc |
| BTC032     | 1695.<br>0 | 1783.<br>6 | 2129.<br>0 | 1802.7<br>e    | 1654.0 | 1472.<br>1 bc | 1632.<br>3 | 1405.<br>8 | 1435.<br>3 abc | 1513.<br>0 ab | 1177.<br>7 a  | 937.2<br>ab  |
| S11 675-02 | 1803.<br>6 | 1823.<br>6 | 2168.<br>2 | 1935.1<br>bcde | 1743.6 | 1644.<br>4 a  | 1796.<br>8 | 1468.<br>2 | 1374.<br>6 bc  | 1256.<br>3 bc | 656.7<br>d    | 513.6<br>def |
| S11 729-10 | 1828.<br>0 | 1890.<br>0 | 2190.<br>9 | 1987.2<br>abc  | 1870.7 | 1548.<br>4 ab | 1747.<br>8 | 1484.<br>0 | 1517.<br>5 ab  | 1424.<br>1 ab | 1036.<br>8 ab | 1024.<br>4 a |
| LSD        | ns         | ns         | ns         | 137.2          | ns     | 120.6         | ns         | ns         | 274.1          | 290.8         | 336.9         | 265.3        |

Note: values followed by a common lowercase letter within each column indicate no significant difference among various lines at  $p = 0.05$ ; ns, not significant

**Table S9.** Change in ETo/CSm for creeping bentgrass lines over time under control (20/15°C day/night) and heat stress (38/33°C day/night) conditions

| Lines        | Control    |            |            |                |        |                    | Heat   |           |               |             |              |              |
|--------------|------------|------------|------------|----------------|--------|--------------------|--------|-----------|---------------|-------------|--------------|--------------|
|              | 0          | 7          | 14         | 21             | 28     | 35                 | 0      | 7         | 14            | 21          | 28           | 35           |
| Crenshaw     | 1182.<br>8 | 1307.<br>5 | 1506.<br>3 | 1289.8<br>abc  | 1122.7 | 1030.<br>8 abc     | 1180.1 | 943.<br>4 | 765.2<br>c    | 592.5<br>c  | 386.1<br>c   | 153.7<br>f   |
| Pure Eclipse | 1121.<br>9 | 1279.<br>8 | 1460.<br>1 | 1363.0<br>a    | 1188.5 | 1019.<br>1<br>abcd | 1151.5 | 914.<br>4 | 1014.<br>5 ab | 855.4<br>ab | 499.1<br>bc  | 213.4<br>ef  |
| Penn A4      | 1151.<br>4 | 1309.<br>0 | 1472.<br>4 | 1243.6<br>cd   | 1095.9 | 1047.<br>2 ab      | 1047.0 | 966.<br>0 | 1025.<br>3 ab | 950.1<br>ab | 683.7<br>ab  | 395.1<br>bcd |
| AU           | 1200.      | 1258.      | 1588.      | 1350.8         | 1119.1 | 973.9              | 1207.9 | 1070      | 1137.         | 1031.       | 730.5        | 592.8        |
| Victory      | 0          | 9          | 6          | ab             |        | bcde               |        | .9        | 6 a           | 6 a         | a            | a            |
| Pennncross   | 1158.<br>8 | 1220.<br>0 | 1468.<br>2 | 1221.9<br>cd   | 1096.0 | 961.3<br>cde       | 1172.1 | 989.<br>5 | 1045.<br>1 ab | 944.8<br>ab | 520.5<br>abc | 470.4<br>abc |
| GCB2020-1    | 1069.<br>7 | 1244.<br>5 | 1504.<br>3 | 1199.3<br>cd   | 1045.8 | 1031.<br>1 abc     | 1039.5 | 918.<br>1 | 904.0<br>bc   | 912.6<br>ab | 612.3<br>ab  | 355.5<br>cde |
| BTC011       | 1053.<br>8 | 1193.<br>6 | 1403.<br>1 | 1271.3<br>abcd | 1129.4 | 916.0<br>e         | 1097.5 | 917.<br>6 | 1053.<br>1 ab | 942.6<br>ab | 726.2<br>a   | 476.9<br>abc |
| BTC032       | 1101.<br>1 | 1177.<br>3 | 1448.<br>1 | 1167.9<br>d    | 1055.7 | 942.5<br>de        | 1058.6 | 937.<br>5 | 964.1<br>ab   | 977.4<br>a  | 729.1<br>a   | 560.4<br>ab  |
| S11 675-02   | 1168.<br>3 | 1213.<br>9 | 1469.<br>5 | 1253.6<br>bcd  | 1124.7 | 1076.<br>9 a       | 1169.2 | 943.<br>0 | 877.4<br>bc   | 786.0<br>b  | 363.5<br>c   | 262.1<br>def |
| S11 729-10   | 1162.<br>0 | 1243.<br>9 | 1455.<br>1 | 1263.9<br>abcd | 1172.2 | 976.5<br>bcde      | 1118.3 | 941.<br>8 | 977.1<br>ab   | 882.7<br>ab | 640.8<br>ab  | 596.9<br>a   |
| LSD          | ns         | ns         | ns         | 103.6          | ns     | 84.7               | ns     | ns        | 193.3         | 188.0       | 211.0        | 180.0        |

Note: values followed by a common lowercase letter within each column indicate no significant difference among various lines at  $p = 0.05$ ; ns, not significant

**Table S10.** Change in electrolyte leakage (%) for creeping bentgrass lines over time under control (20/15°C day/night) and heat stress (38/33°C day/night) conditions

| Lines        | Control |            |           |             |            |      | Heat |      |           |             |             |          |
|--------------|---------|------------|-----------|-------------|------------|------|------|------|-----------|-------------|-------------|----------|
|              | 0       | 7          | 14        | 21          | 28         | 35   | 0    | 7    | 14        | 21          | 28          | 35       |
| Crenshaw     | 33.0    | 29.1<br>a  | 35.9<br>a | 35.6<br>abc | 41.2<br>a  | 30.5 | 31.9 | 44.3 | 68.0<br>a | 69.7 a      | 72.6 a      | 83.2 a   |
| Pure Eclipse | 31.7    | 29.8<br>a  | 39.4<br>a | 37.9 a      | 40.6<br>a  | 35.8 | 32.2 | 40.0 | 48.3<br>b | 59.3 b      | 66.5 ab     | 80.5 ab  |
| Penn A4      | 36.0    | 27.5<br>ab | 37.8<br>a | 36.3<br>ab  | 34.7<br>bc | 33.4 | 29.8 | 38.9 | 51.0<br>b | 50.0<br>bc  | 57.0<br>bcd | 68.7 bcd |
| AU Victory   | 25.9    | 19.8<br>c  | 26.3<br>b | 28.0 d      | 29.7<br>d  | 30.5 | 26.3 | 29.4 | 41.1<br>b | 47.5<br>cde | 51.1 cd     | 55.2 ef  |
| Pennncross   | 27.9    | 20.2<br>c  | 23.7<br>b | 26.6 d      | 29.9<br>d  | 27.9 | 27.1 | 31.4 | 40.7<br>b | 48.2<br>cd  | 57.0<br>bcd | 60.5 de  |
| GCB2020-1    | 32.1    | 20.9<br>c  | 28.1<br>b | 34.4<br>abc | 35.9<br>b  | 34.9 | 29.0 | 31.9 | 44.2<br>b | 42.7<br>cde | 55.6<br>bcd | 63.9 cde |
| BTC011       | 28.4    | 21.4<br>c  | 26.3<br>b | 28.2 d      | 30.8<br>cd | 30.7 | 30.3 | 36.2 | 46.6<br>b | 42.9<br>cde | 47.9 d      | 56.7 def |
| BTC032       | 28.5    | 20.8<br>c  | 28.3<br>b | 30.4<br>cd  | 29.0<br>d  | 32.2 | 28.6 | 33.1 | 45.2<br>b | 39.2<br>de  | 50.5 cd     | 53.9 ef  |
| S11 675-02   | 33.6    | 20.3<br>c  | 24.9<br>b | 31.0<br>bcd | 29.7<br>d  | 28.3 | 33.8 | 35.8 | 49.8<br>b | 49.0 c      | 61.0 abc    | 73.3 abc |
| S11 729-10   | 36.9    | 23.3<br>bc | 25.8<br>b | 30.8<br>bcd | 28.7<br>d  | 30.9 | 34.6 | 33.2 | 39.7<br>b | 38.5 e      | 43.9 d      | 45.0 f   |
| LSD          | ns      | 4.5        | 6.2       | 5.8         | 4.0        | ns   | ns   | ns   | 12.0      | 9.7         | 13.1        | 12.8     |

Note: values followed by a common lowercase letter within each column indicate no significant difference among various lines at  $p = 0.05$ ; ns, not significant

**Table S11.** Change in MDA content (mg per g FW) for creeping bentgrass lines over time under control (20/15°C day/night) and heat stress (38/33°C day/night) conditions

| Lines        | Control |          |      |      |      | Heat    |      |           |          |          |
|--------------|---------|----------|------|------|------|---------|------|-----------|----------|----------|
|              | 0       | 7        | 21   | 28   | 35   | 0       | 7    | 21        | 28       | 35       |
| Crenshaw     | 17.1 c  | 23.2 e   | 22.8 | 20.7 | 21.2 | 19.1 c  | 36.4 | 61.0 a    | 85.4 a   | 96.5 a   |
| Pure Eclipse | 25.6 ab | 33.7 bcd | 26.4 | 23.4 | 23.0 | 24.9 b  | 41.6 | 54.5 ab   | 72.7 ab  | 86.7 ab  |
| Penn A4      | 21.1 bc | 26.9 de  | 22.3 | 24.4 | 24.9 | 23.8 b  | 40.2 | 38.3 d    | 55.6 bc  | 53.3 de  |
| AU Victory   | 23.5 ab | 33.1 bcd | 27.7 | 23.9 | 24.9 | 26.5 ab | 45.0 | 51.0 abcd | 54.7 bc  | 56.9 cde |
| Penncross    | 22.2 b  | 28.0 cde | 23.7 | 22.1 | 22.0 | 25.0 b  | 37.3 | 51.7 abc  | 52.8 bc  | 60.5 cde |
| GCB2020-1    | 23.8 ab | 35.4 b   | 26.9 | 24.4 | 24.7 | 25.5 b  | 39.4 | 45.7 bcd  | 63.7 abc | 76.8 abc |
| BTC011       | 21.7 bc | 33.4 bcd | 24.3 | 23.6 | 22.0 | 24.6 b  | 42.7 | 40.6 cd   | 47.3 c   | 55.4 cde |
| BTC032       | 24.2 ab | 36.4 b   | 27.0 | 27.6 | 25.7 | 25.6 b  | 36.9 | 41.8 bcd  | 50.7 bc  | 55.8 cde |
| S11 675-02   | 27.8 a  | 43.7 a   | 31.0 | 26.6 | 23.9 | 30.2 a  | 44.7 | 48.8 abcd | 66.5 abc | 71.6 bcd |
| S11 729-10   | 22.2 b  | 35.0 bc  | 23.2 | 21.7 | 20.6 | 23.1 bc | 39.8 | 41.1 cd   | 51.1 bc  | 47.5 e   |
| LSD          | 4.8     | 6.5      | ns   | ns   | ns   | 4.2     | ns   | 13.3      | 22.2     | 23.0     |

Note: values followed by a common lowercase letter within each column indicate no significant difference among various lines at  $p = 0.05$ ; ns, not significant

**Table S12.** Change in protein content (mg per g FW) for creeping bentgrass lines over time under control (20/15°C day/night) and heat stress (38/33°C day/night) conditions

| Lines        | Control |      |         |      |        | Heat |      |      |          |          |
|--------------|---------|------|---------|------|--------|------|------|------|----------|----------|
|              | 0       | 7    | 21      | 28   | 35     | 0    | 7    | 21   | 28       | 35       |
| Crenshaw     | 37.3 ab | 31.8 | 31.3 a  | 31.9 | 34.5 a | 35.6 | 40.7 | 34.8 | 27.8 d   | 21.1 d   |
| Pure Eclipse | 38.2 a  | 40.1 | 27.9 ab | 29.7 | 27.4 b | 39.2 | 40.9 | 33.7 | 32.2 bc  | 30.3 bc  |
| Penn A4      | 34.6 c  | 36.7 | 23.0 c  | 29.5 | 27.1 b | 36.9 | 34.5 | 31.7 | 30.6 bcd | 27.4 cd  |
| AU Victory   | 38.7 a  | 39.7 | 29.5 ab | 29.2 | 28.5 b | 39.2 | 39.1 | 32.6 | 33.1 bc  | 29.2 c   |
| Penncross    | 35.1 bc | 34.7 | 27.8 b  | 28.6 | 26.8 b | 40.0 | 37.0 | 34.3 | 31.0 bcd | 28.7 c   |
| GCB2020-1    | 38.5 a  | 39.4 | 29.0 ab | 31.3 | 27.7 b | 39.0 | 39.7 | 34.3 | 31.3 bcd | 29.9 bc  |
| BTC011       | 34.3 c  | 38.1 | 27.9 ab | 28.5 | 26.3 b | 36.6 | 42.9 | 34.8 | 34.6 ab  | 32.9 abc |
| BTC032       | 35.2 bc | 39.8 | 27.1 b  | 28.3 | 26.9 b | 36.5 | 40.1 | 34.5 | 34.9 ab  | 36.1 ab  |
| S11 675-02   | 38.6 a  | 44.4 | 30.5 ab | 30.3 | 28.0 b | 38.9 | 36.8 | 33.4 | 30.2 cd  | 27.9 c   |
| S11 729-10   | 39.1 a  | 37.7 | 29.8 ab | 30.8 | 26.6 b | 36.5 | 43.9 | 37.0 | 38.0 a   | 38.6 a   |
| LSD          | 2.3     | ns   | 3.5     | ns   | 3.8    | ns   | ns   | ns   | 4.4      | 6.8      |

Note: values followed by a common lowercase letter within each column indicate no significant difference among various lines at  $p = 0.05$ ; ns, not significant
